# Supplementary material for: Early Effect of 0.005% Estriol Vaginal Gel on Symptoms and Signs of Vulvovaginal Atrophy
Source: PubMed Central journal article supplement — J Menopausal Med. 2022 Jul 28;28(2):60–9. doi: 10.6118/jmm.21038 (PMC9452593; doi:10.6118/jmm.21038), 2022-07-28

**Supplementary Fig. 2.** Mean change from baseline in individual signs scores at days 7 and 14. *P* values were obtained by comparing with baseline. \* *P* < 0.05, Student's *t* test for paired samples.

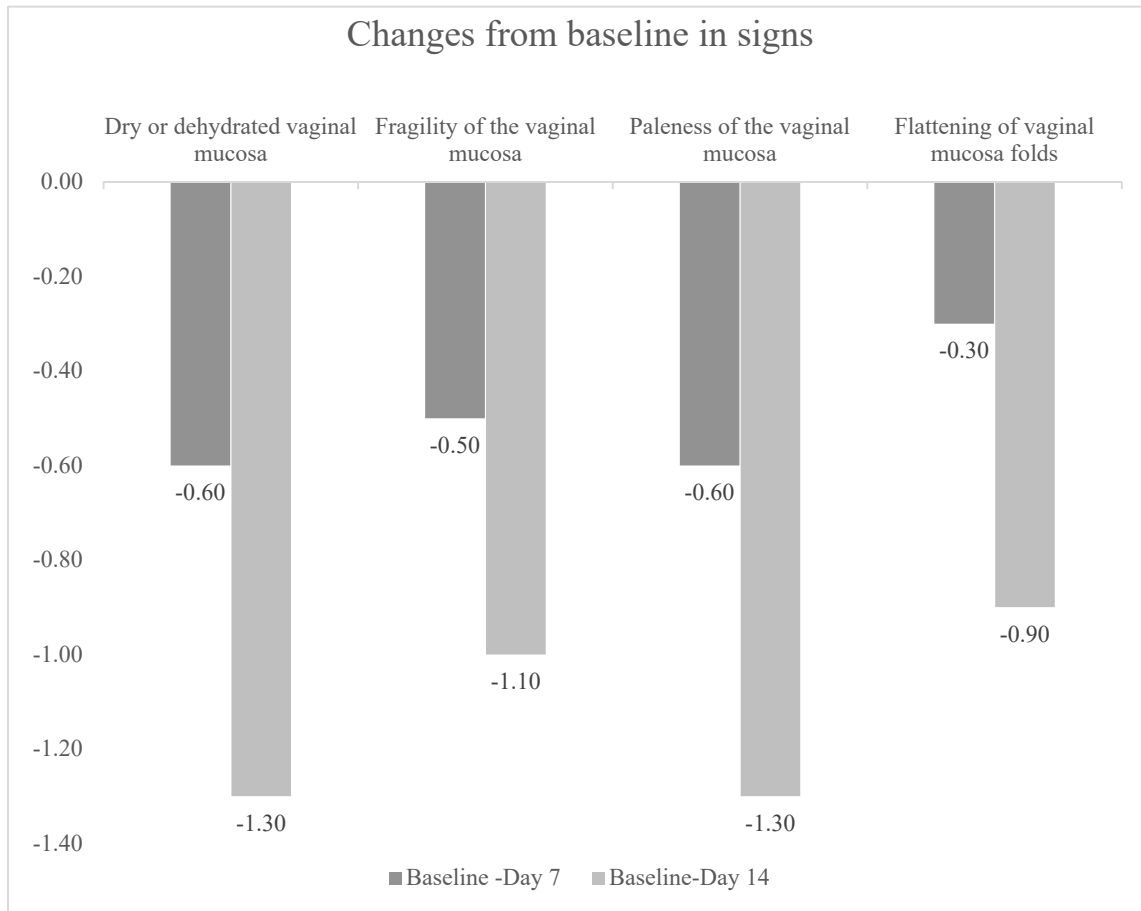

Supplement: jmm-28-60-s002.pdf [file jmm-28-60-s002.pdf]
